# Supplementary material
Source: Springer Nature journal article supplement (https://www.springermedizin.de/resource/supplementary/13047_2013_603_MOESM8_ESM.pdf/9664184)
Supplement: MOESM8 [file 9664184]

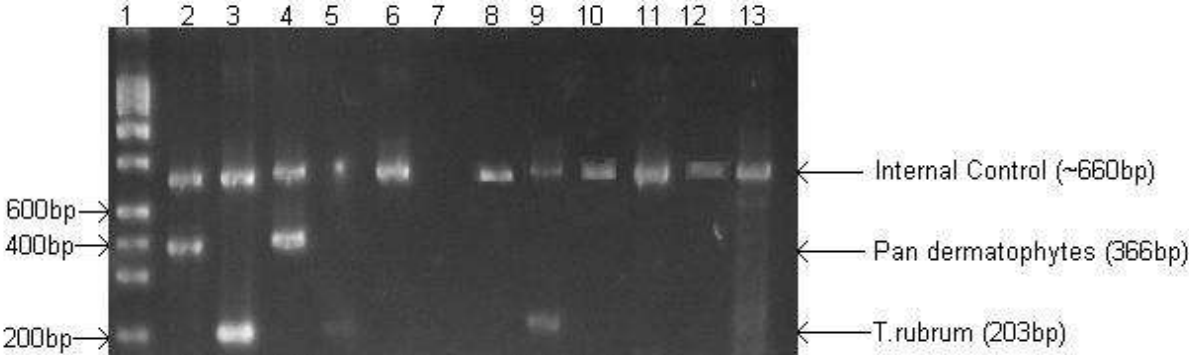

1. Ladder 2. Pan-dermatophyte Control 3. T.rubrum Control  
4. Lab strain T.tonsurans 5. Lab strain T.rubrum  
6. Negative control 7. Empty well 8-13 test samples.
